# Supplementary material for: Computational analysis of calculated physicochemical and ADMET properties of protein-protein interaction inhibitors
Source: PubMed Central journal article supplement (PMC5387685; doi:10.1038/srep46277), 2017-04-11
Supplement: srep46277-s1.pdf [file srep46277-s1.pdf]

# Supplementary Information

## Computational analysis of calculated physicochemical and ADMET properties of protein-protein interaction inhibitors

David Lagorce<sup>1</sup>, Dominique Douguet<sup>2</sup>, Maria A. Miteva<sup>1</sup>, Bruno O. Villoutreix<sup>1</sup>

<sup>1</sup>INSERM, U973, Université Paris Diderot, Sorbonne Paris Cité, Paris, France

<sup>2</sup>CNRS UMR7275, Institut de Pharmacologie Moléculaire et Cellulaire, Université Côte d'Azur, Valbonne, France

*Correspondence to:* Bruno Villoutreix

*e-mail:* Bruno.Villoutreix@inserm.fr

**Keywords:** ADMET, toxicity, chemical space, protein-protein interaction inhibitor, drug design, virtual screening

|                  | Enzymes |     |     |     | GPCRs |     |     |     | Ion Channels |     |     |     | Nuclear Receptors |     |     |     | Allosterics |     |     |     | iPPiS |     |     |     | OMD |     |     |     | NPD |     |     |     |
|------------------|---------|-----|-----|-----|-------|-----|-----|-----|--------------|-----|-----|-----|-------------------|-----|-----|-----|-------------|-----|-----|-----|-------|-----|-----|-----|-----|-----|-----|-----|-----|-----|-----|-----|
|                  | M       | SEM | LB  | UB  | M     | SEM | LB  | UB  | M            | SEM | LB  | UB  | M                 | SEM | LB  | UB  | M           | SEM | LB  | UB  | M     | SEM | LB  | UB  | M   | SEM | LB  | UB  | M   | SEM | LB  | UB  |
| MW               | 415     | 14  | 405 | 427 | 398   | 13  | 388 | 407 | 337          | 11  | 328 | 345 | 396               | 10  | 388 | 403 | 356         | 11  | 348 | 365 | 521   | 12  | 513 | 530 | 337 | 11  | 326 | 347 | 399 | 16  | 369 | 428 |
| logP             | 3.1     | 0.2 | 3   | 3.3 | 3.5   | 0.2 | 3.4 | 3.7 | 2.9          | 0.2 | 2.7 | 3   | 4.8               | 0.2 | 4.7 | 4.9 | 3.6         | 0.2 | 3.5 | 3.8 | 4.8   | 0.2 | 4.7 | 5   | 2.9 | 0.2 | 2.7 | 3   | 2   | 0.3 | 1.4 | 2.6 |
| logD             | 1.9     | 0.3 | 1.7 | 2.1 | 2.3   | 0.3 | 2.1 | 2.5 | 1.8          | 0.3 | 1.6 | 2   | 3.8               | 0.2 | 3.6 | 3.9 | 2.6         | 0.3 | 2.4 | 2.8 | 3.5   | 0.2 | 3.4 | 3.7 | 1.5 | 0.2 | 1.3 | 1.7 | 1.2 | 0.4 | 0.5 | 1.8 |
| TPSA             | 108     | 5.2 | 104 | 111 | 78    | 4.6 | 74  | 81  | 71           | 4.1 | 68  | 74  | 71                | 3.1 | 69  | 73  | 71          | 4.1 | 67  | 73  | 101   | 4   | 98  | 104 | 72  | 3.8 | 69  | 76  | 103 | 6.5 | 91  | 115 |
| Rotatable Bonds  | 6.5     | 0.5 | 6.2 | 6.9 | 6     | 0.4 | 5.7 | 6.3 | 4            | 0.3 | 3.8 | 4.3 | 5.5               | 0.4 | 5.2 | 5.8 | 5.6         | 0.5 | 5.4 | 6.1 | 7     | 0.3 | 6.8 | 7.2 | 5.3 | 0.4 | 5   | 5.6 | 3.9 | 0.3 | 3.2 | 4.5 |
| HBDs             | 2.5     | 0.2 | 2.4 | 2.7 | 1.7   | 0.2 | 1.6 | 1.9 | 1.5          | 0.1 | 1.4 | 1.7 | 1.5               | 0.1 | 1.4 | 1.6 | 1.4         | 0.2 | 1.2 | 1.5 | 2.1   | 0.2 | 2   | 2.2 | 1.7 | 0.1 | 1.5 | 1.8 | 2.8 | 0.3 | 2.3 | 3.3 |
| HBAs             | 7       | 0.3 | 6.7 | 7.2 | 5.6   | 0.3 | 5.4 | 5.8 | 4.9          | 0.2 | 4.8 | 5.1 | 4.5               | 0.2 | 4.3 | 4.6 | 4.8         | 0.3 | 4.6 | 5   | 7     | 0.2 | 6.8 | 7.2 | 4.9 | 0.2 | 4.7 | 5.1 | 6.5 | 0.4 | 5.7 | 7.3 |
| HBDs+HBAs        | 9.5     | 0.5 | 9.1 | 9.8 | 7.3   | 0.4 | 7   | 7.7 | 6.5          | 0.3 | 6.2 | 6.7 | 6                 | 0.3 | 5.8 | 6.2 | 6.1         | 0.4 | 5.8 | 6.4 | 9.1   | 0.3 | 8.9 | 9.4 | 6.6 | 0.3 | 6.3 | 6.9 | 9.3 | 0.6 | 8.1 | 10  |
| Rings            | 2.7     | 0.1 | 2.6 | 2.8 | 2.7   | 0.1 | 2.6 | 2.8 | 2.1          | 0.1 | 2   | 2.2 | 2.4               | 0.1 | 2.3 | 2.5 | 2.2         | 0.1 | 2.2 | 2.3 | 3.7   | 0.1 | 3.6 | 3.8 | 2   | 0.1 | 2   | 2.2 | 1.6 | 0.1 | 1.4 | 1.8 |
| Aromatic Rings   | 2.6     | 0.1 | 2.5 | 2.7 | 2.4   | 0.1 | 2.3 | 2.5 | 2.2          | 0.1 | 2.2 | 2.3 | 2.4               | 0.1 | 2.3 | 2.5 | 2.2         | 0.1 | 2.1 | 2.2 | 3.3   | 0.1 | 3.3 | 3.4 | 1.8 | 0.1 | 1.8 | 1.9 | 0.8 | 0.1 | 0.7 | 0.9 |
| Stereocenters    | 1.2     | 0.2 | 1.1 | 1.4 | 1.4   | 0.2 | 1.2 | 1.5 | 1.3          | 0.2 | 1.1 | 1.4 | 1.5               | 0.2 | 1.3 | 1.7 | 0.8         | 0.1 | 0.7 | 0.9 | 1.6   | 0.2 | 1.4 | 1.7 | 1   | 0.1 | 0.9 | 1.1 | 5.7 | 0.4 | 4.8 | 6.5 |
| Fsp <sup>†</sup> | 0.3     | 0   | 0.3 | 0.3 | 0.4   | 0   | 0.3 | 0.4 | 0.3          | 0   | 0.3 | 0.3 | 0.3               | 0   | 0.3 | 0.3 | 0.3         | 0   | 0.3 | 0.3 | 0.3   | 0   | 0.3 | 0.3 | 0.4 | 0   | 0.3 | 0.4 | 0.6 | 0   | 0.6 | 0.7 |
| Charges          | 0.5     | 0.1 | 0.5 | 0.6 | 0.7   | 0.1 | 0.7 | 0.8 | 0.6          | 0.1 | 0.6 | 0.7 | 0.4               | 0.1 | 0.4 | 0.4 | 0.5         | 0.1 | 0.4 | 0.6 | 0.7   | 0.1 | 0.6 | 0.7 | 0.7 | 0.1 | 0.7 | 0.8 | 0.6 | 0.1 | 0.4 | 0.7 |

**Table S1**

Mean (M), standard error of the mean (SEM) and 95% CI of the mean (95% lower and upper boundaries are noted LB and UB, respectively, under these conditions, the mean is in the interval between both data values) for the PC computations of all datasets.

## Legends to supplementary figures

### Figure S1. Caco-2 prediction

Kernel density estimation for human colon carcinoma cells (Caco-2) permeability computed by StarDrop v6.1<sup>1</sup>. Enzymes (light-blue), ion channels (blue), GPCRs (purple), nuclear receptors (yellow), allosteric modulators (brown), iPPiS (orange), OMD (light green) and NPD (dark green).

### Figure S2. Metabolic stability prediction – Half-life

Kernel density estimation of metabolic stability (half-life) predicted by StarDrop v6.1<sup>1</sup>. Enzymes (light-blue), ion channels (blue), GPCRs (purple), nuclear receptors (yellow), allosteric modulators (brown), iPPiS (orange), OMD (light green) and NPD (dark green). The molecules with a value above 0.5 are considered as stable.

### **Figure S3. hERG prediction**

Kernel density estimation of hERG pIC<sub>50</sub> (15) predicted by StarDrop v6.1<sup>1</sup>. Enzymes (light-blue), ion channels (blue), GPCRs (purple), nuclear receptors (yellow), allosteric modulators (brown), iPPiIs (orange), OMD (light green) and NPD (dark green).

### **Figure S4. Clearance**

Kernel density estimation of total clearance (logCL(ml/min/kg)) computed by the pkCSM web-server<sup>2</sup>. Enzymes (light-blue), ion channels (blue), GPCRs (purple), nuclear receptors (yellow), allosteric modulators (brown), iPPiIs (orange), OMD (light green) and NPD (dark green).

### **Figure S5. pLD<sub>50</sub>**

Kernel density estimation of rat LD<sub>50</sub> predicted by StarDrop v6.1<sup>1</sup>. The negative logarithm of the amount of chemical in mol/kg body weight that causes 50% of rats to die after oral ingestion (Rat oral -log(LD<sub>50</sub>)). Enzymes (light-blue), ion channels (blue), GPCRs (purple), nuclear receptors (yellow), allosteric modulators (brown), iPPiIs (orange), OMD (light green) and NPD (dark green).

### **Figure S6. AMES**

AMES mutagenicity predicted by both StarDrop v6.1<sup>1</sup> and the pkCSM web-server<sup>2</sup>.

### **Figure S7. PAINS**

Matrix plot of PAINS detection computed by the FAF-Drugs3 server<sup>3</sup>. Frequency (%) is colored as follow: green <0.4, 0.4<yellow<2, 2<orange<4, 4<red<6.2, 6.2<light pink<10, 10<pink<15, 15<dark pink<30, 30<purple<50.

### **Figure S8. Data set preparations**

Visualization of all datasets chemical spaces (filtered dataset in light blue, diversity dataset in red and random dataset in white) obtained with the projection visualization tool of StarDrop 6.1<sup>1</sup>, based on path-based fingerprints and Tanimoto similarity.

- 1 StarDrop v. 6.1 (2016).
- 2 Pires, D. E., Blundell, T. L. & Ascher, D. B. pkCSM: Predicting Small-Molecule Pharmacokinetic and Toxicity Properties Using Graph-Based Signatures. *J Med Chem* **58**, 4066-4072, doi:10.1021/acs.jmedchem.5b00104 (2015).
- 3 Lagorce, D., Sperandio, O., Baell, J. B., Miteva, M. A. & Villoutreix, B. O. FAF-Drugs3: a web server for compound property calculation and chemical library design. *Nucleic Acids Res* **43**, W200-207, doi:gkv353 [pii] 10.1093/nar/gkv353 (2015).

### Supplementary figures

Figure S1.

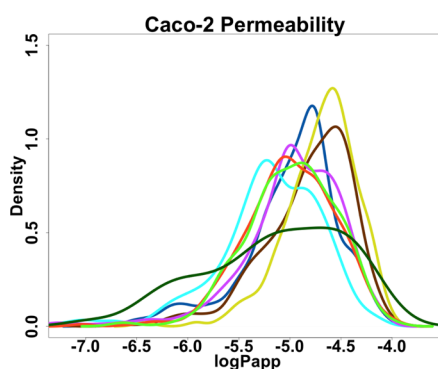

Figure S2.

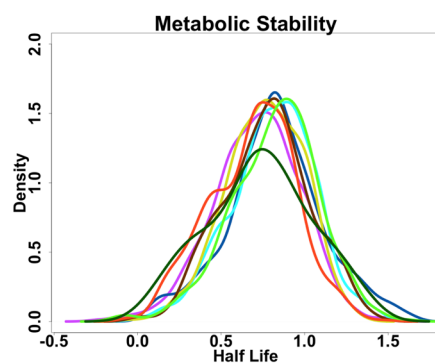

Figure S3.

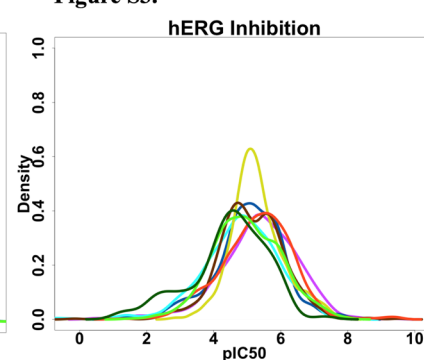

Figure S4.

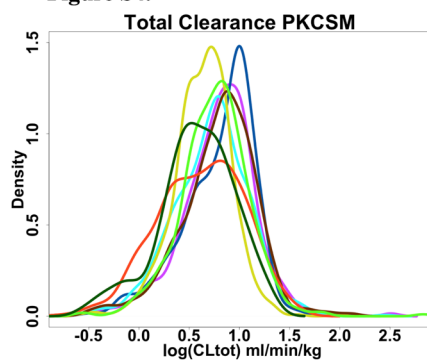

Figure S5.

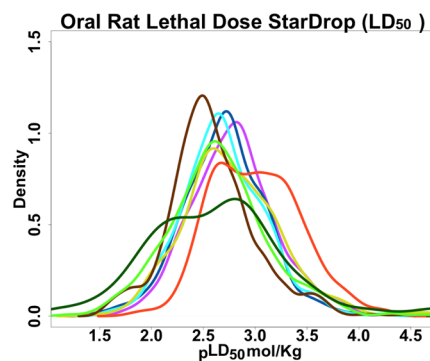



**Figure S8**

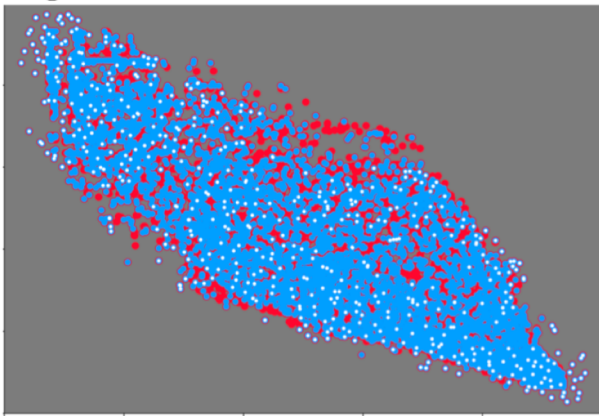

**ENZYMES**

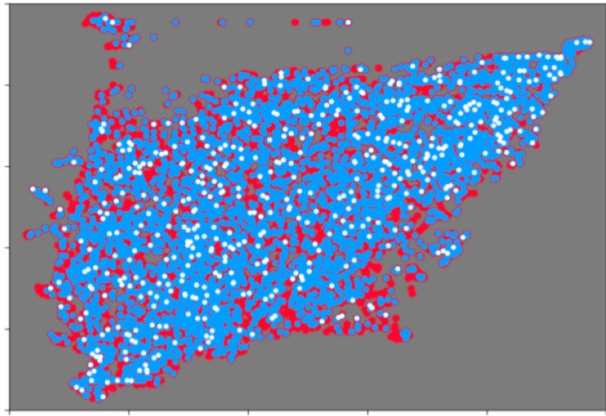

**GPCRs**

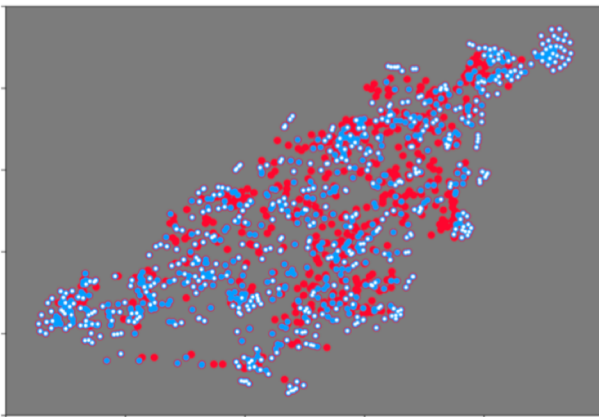

**ION CHANNELS**

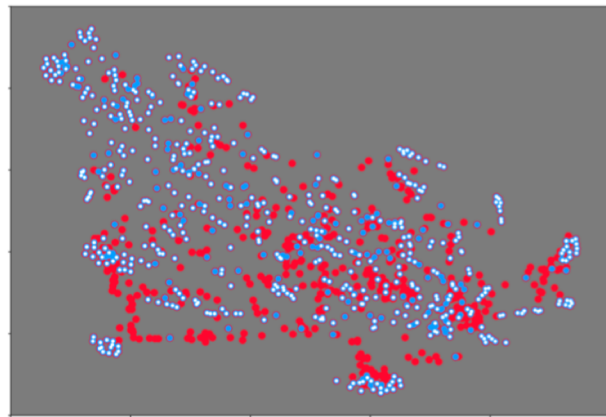

**ALLOSTERICs**

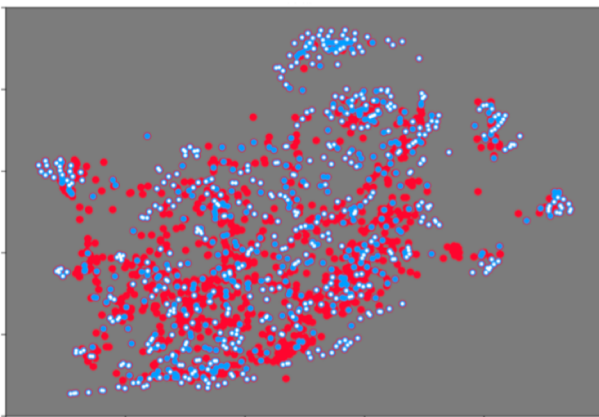

**NUCLEAR RECEPTORS**

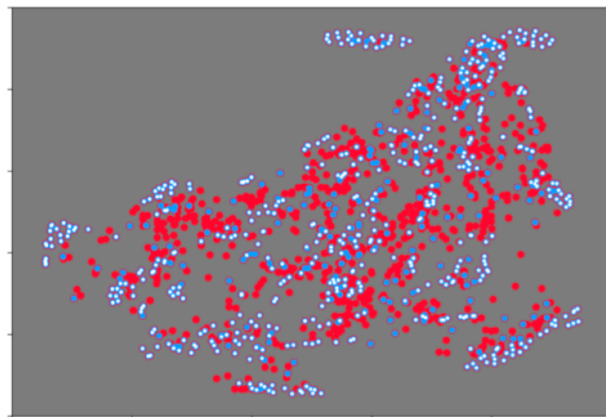

**iPPiIs**

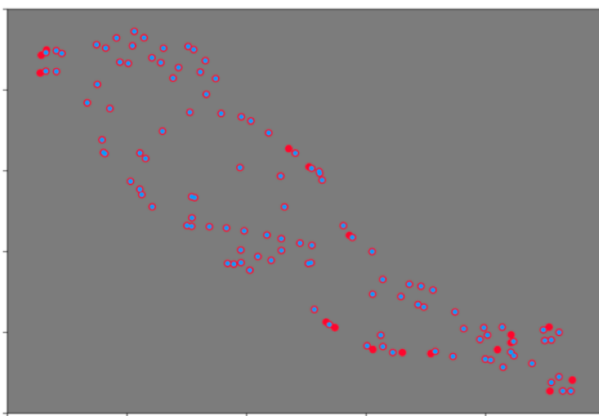

**NPD**

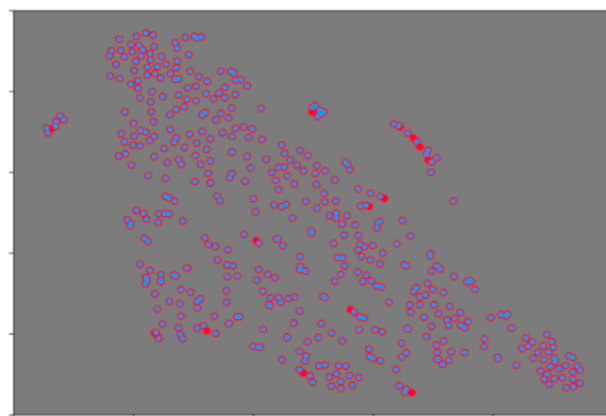

**OMD**
